# Supplementary material
Source: PubMed Central journal article supplement (PMC6108183)
Supplement: NIHMS938437-supplement-supplementary_materials_S1-S4.pdf [file NIHMS938437-supplement-supplementary_materials_S1-S4.pdf]

1 **Supplementary Materials**

2  
3 **Title:** Comparison of two bioinformatics tools used to characterize the microbial diversity and  
4 predictive functional attributes of microbial mats from Lake Obersee, Antarctica.

5  
6  
7 **Authors:** Hyunmin Koo<sup>1\*</sup>, Joseph A. Hakim<sup>1</sup>, Casey D. Morrow<sup>2</sup>, Alfonso Davila<sup>3</sup>, Dale T.  
8 Andersen<sup>4</sup> and Asim K. Bej<sup>1\*</sup>

9  
10  
11  
12 **Affiliations:** <sup>1</sup>Department of Biology, University of Alabama at Birmingham, Birmingham, AL,  
13 USA, <sup>2</sup>Cell, Developmental, and Integrative Biology, University of Alabama at Birmingham,  
14 Birmingham, AL, USA, <sup>3</sup>NASA Ames Research Center, MS 245-3, Moffett Field, CA, <sup>4</sup>Carl  
15 Sagan Center, SETI Institute, Mountain View, CA, USA.

16  
17  
18  
19 **\*Corresponding authors:** Hyunmin Koo and Asim K. Bej

20  
21  
22 **Key words:** PICRUSt, Tax4Fun, SILVA, Greengenes, R Code, NextGen sequencing

23  
24  
25 **Running Title:** Comparison of PICRUSt and Tax4Fun on Lake Obersee microbial mats  
26 metagenome

27  
28  
29 **Corresponding Authors Address:**  
30 Hyunmin Koo, MS (email: [khmkhm87@uab.edu](mailto:khmkhm87@uab.edu))  
31 Asim K. Bej, PhD (email: [abej@uab.edu](mailto:abej@uab.edu))  
32 1300 University Blvd., CH464  
33 University of Alabama at Birmingham  
34 Birmingham, AL 35294-1170, USA  
35 Phone: +1 (205) 934-8308  
36 FAX: +1 (205) 975-6097

38 **Supplementary material S1:** Screenshots figures (S1.1 and S1.2) represent KEGG annotated  
39 sequence files generated from two different bioinformatics tools; 1) PICRUSt and 2) Tax4Fun.

40  
41 **S1.1:** Screenshot of the first page of a KEGG annotated sequence file generated from PICRUSt.  
42 A total 6909 KEGGID has found and contained in the KEGG annotated sequence file for  
43 comparison analysis. The file was saved as comma delimited (.csv) file format with desired file  
44 name (“KEGG\_Table\_PICRUSt.csv”) to upload into RStudio. In this study, we saved  
45 “KEGG\_Table\_PICRUSt.csv” file into “C:\#your user name\Documents\LakeObersee” directory.  
46

| #KEGGID | OB12-Pie | OB13-Pie |
|---------|----------|----------|
| K00001  | 0.000613 | 0.000416 |
| K00002  | 6.52E-06 | 6.90E-06 |
| K00003  | 0.000609 | 0.000492 |
| K00004  | 6.75E-06 | 1.25E-06 |
| K00005  | 0.000166 | 8.33E-05 |
| K00007  | 5.14E-06 | 1.11E-05 |
| K00008  | 0.000238 | 0.000197 |
| K00009  | 2.89E-05 | 9.63E-06 |
| K00010  | 6.57E-05 | 5.36E-05 |
| K00011  | 7.51E-06 | 1.84E-05 |
| K00012  | 0.000737 | 0.000745 |
| K00013  | 0.00056  | 0.000577 |
| K00014  | 0.000782 | 0.000628 |
| K00015  | 7.80E-05 | 6.39E-05 |
| K00016  | 0.000435 | 6.88E-05 |
| K00018  | 0.000282 | 6.52E-05 |
| K00019  | 8.28E-05 | 0.000253 |
| K00020  | 0.000306 | 0.000539 |
| K00021  | 3.43E-06 | 8.75E-06 |
| K00022  | 0        | 0        |
| K00023  | 9.24E-05 | 0.0004   |
| K00024  | 0.000498 | 0.000525 |
| K00025  | 1.04E-05 | 1.17E-07 |
| K00026  | 0        | 0        |
| K00027  | 0.000289 | 0.000122 |
| K00028  | 2.07E-07 | 4.68E-08 |
| K00029  | 0.000304 | 0.000473 |
| K00030  | 0.000212 | 0.00028  |

47  
48  
49

50 **S1.2:** Screenshot of the first page of a KEGG annotated sequence file generated from Tax4Fun.  
 51 A total 6559 KEGGID has identified and included in the KEGG annotated sequence file for  
 52 comparison analysis. The file was saved as comma delimited (.csv) file format with desired file  
 53 name (“KEGG\_Table\_Tax4Fun.csv”) to upload into RStudio. In this study, we saved  
 54 “KEGG\_Table\_Tax4Fun.csv” file into “C:\#your user name\Documents\LakeObersee” directory.  
 55

| #KEGGID                                                                            | OB13-T4F | OB12-T4F |
|------------------------------------------------------------------------------------|----------|----------|
| K00001; alcohol dehydrogenase [EC:1.1.1.1]                                         | 0.000463 | 0.000356 |
| K00002; alcohol dehydrogenase (NADP+) [EC:1.1.1.2]                                 | 1.87E-05 | 1.20E-05 |
| K00003; homoserine dehydrogenase [EC:1.1.1.3]                                      | 0.000523 | 0.000634 |
| K00004; (R,R)-butanediol dehydrogenase / diacetyl reductase [EC:1.1.1.4 1.1.1.303] | 3.37E-06 | 7.60E-06 |
| K00005; glycerol dehydrogenase [EC:1.1.1.6]                                        | 0.000118 | 0.000127 |
| K00007; D-arabinitol 4-dehydrogenase [EC:1.1.1.11]                                 | 1.70E-05 | 6.78E-06 |
| K00008; L-iditol 2-dehydrogenase [EC:1.1.1.14]                                     | 6.76E-05 | 8.87E-05 |
| K00009; mannitol-1-phosphate 5-dehydrogenase [EC:1.1.1.17]                         | 2.41E-06 | 3.89E-05 |
| K00010; myo-inositol 2-dehydrogenase [EC:1.1.1.18]                                 | 0.000198 | 0.000142 |
| K00011; aldehyde reductase [EC:1.1.1.21]                                           | 9.60E-07 | 4.77E-07 |
| K00012; UDPglucose 6-dehydrogenase [EC:1.1.1.22]                                   | 0.000862 | 0.000993 |
| K00013; histidinol dehydrogenase [EC:1.1.1.23]                                     | 0.000773 | 0.000732 |
| K00014; shikimate dehydrogenase [EC:1.1.1.25]                                      | 0.000569 | 0.000604 |
| K00015; glyoxylate reductase [EC:1.1.1.26]                                         | 9.22E-05 | 0.000141 |
| K00016; L-lactate dehydrogenase [EC:1.1.1.27]                                      | 5.25E-05 | 0.000411 |
| K00018; glycerate dehydrogenase [EC:1.1.1.29]                                      | 5.38E-05 | 0.000247 |
| K00019; 3-hydroxybutyrate dehydrogenase [EC:1.1.1.30]                              | 0.000169 | 7.05E-05 |
| K00020; 3-hydroxyisobutyrate dehydrogenase [EC:1.1.1.31]                           | 0.000555 | 0.000354 |
| K00021; hydroxymethylglutaryl-CoA reductase (NADPH) [EC:1.1.1.34]                  | 6.55E-06 | 2.49E-06 |
| K00023; acetoacetyl-CoA reductase [EC:1.1.1.36]                                    | 0.000198 | 4.83E-05 |
| K00024; malate dehydrogenase [EC:1.1.1.37]                                         | 0.000486 | 0.000543 |
| K00027; malate dehydrogenase (oxaloacetate-decarboxylating) [EC:1.1.1.38]          | 0.000189 | 0.000415 |
| K00029; malate dehydrogenase (oxaloacetate-decarboxylating)(NADP+) [EC:1.1.1.40]   | 0.000951 | 0.000828 |
| K00030; isocitrate dehydrogenase (NAD+) [EC:1.1.1.41]                              | 0.0003   | 0.000259 |

56  
57

58 **Supplementary material S2:** Description of the R code for comparison analysis between  
59 “KEGG\_Table\_PICRUSt.csv” and “KEGG\_Table\_Tax4Fun.csv” file used in this study.  
60  
61 # RStudio\_workflow  
62 # Description of elements. To excute below commands, both sequence files  
63 (“KEGG\_Table\_PICRUSt.csv” and “KEGG\_Table\_Tax4Fun.csv”) need to be saved on  
64 “C:\#your user name\Documents\LakeObersee” directory.  
65  
66 **Type: setwd(“C:\#your user name\Documents\LakeObersee”)**  
67 #This command will set up the directory folder path in the RStudio. One can change the folder  
68 path according to the file location.  
69  
70 **Type:**  
71 **keghtable\_Tax4Fun.data <- read.csv(“KEGG\_Table\_Tax4Fun.csv ", sep="," ,**  
72 **header=TRUE, na.strings = "?", stringsAsFactors = FALSE)**  
73 # This command will load “KEGG\_Table\_Tax4Fun.csv” file into RStudio. File name can change  
74 accordingly.  
75  
76 **keghtable\_PICRUSt.data <- read.csv(“KEGG\_Table\_PICRUSt.csv ", sep="," ,**  
77 **header=TRUE, na.strings = "?", stringsAsFactors = FALSE)**  
78 # This command will load “KEGG\_Table\_PICRUSt.csv” file into RStudio. File name can  
79 change accordingly.  
80  
81 **Type: keghtable\_Tax4Fun.data \$X.KEGGID <- gsub("(K[0-9]+);.\*", "\\1",**  
82 **keghtable\_Tax4Fun.data \$X.KEGGID)**  
83 # This command will be applied only for the “KEGG\_Table\_Tax4Fun.csv” file. Since  
84 “KEGG\_Table\_Tax4Fun.csv” file has extra information on KEGGID column compared to the  
85 “KEGG\_Table\_PICRUSt.csv” file, this command will help to remove the extra information and  
86 leave only KEGGID numbers on the KEGGID column.  
87  
88 **Type (optional): write.table(keghtable\_Tax4Fun.data, " keghtable\_Tax4Fun.tsv", sep="\t",**  
89 **row.names=FALSE)**  
90 # This command will be applied only for the “KEGG\_Table\_Tax4Fun.csv” file. After removed  
91 all extra information from the KEGGID column, this command will help to export a filtered  
92 “keghtable\_Tax4Fun.tsv”, which can be used to compare with “keghtable\_PICRUSt.data”.  
93  
94 **Type: merge\_table <- merge(keghtable\_Tax4Fun.data, keghtable\_PICRUSt.data, all**  
95 **=TRUE)**  
96 # This command will help to merge “keghtable\_Tax4Fun.data” and “keghtable\_PICRUSt.data”  
97 into one table.  
98  
99 **Type: merge\_table[is.na(merge\_table)] <- "NA"**  
100 # This command will find an empty space in merge\_table data, and then replace it to “NA  
101 (character)”.  
102  
103

```

104 Type (optional): write.table(merge_table, "merged_Tax4Fun_PICRUSt.tsv", sep="\t")
105 # This command will export merge_table file into an actual table file format
106 ("merged_Tax4Fun_PICRUSt.tsv").
107
108 Type: collist <- c("OB12_pie", "OB13_pie", "OB12_t4f", "OB13_t4f")
109 # This command will need to include all column list. In this study, we put "OB12_pie",
110 "OB13_pie", "OB12_t4f", "OB13_t4f" as a column list.
111
112 Type:
113 sel <- apply(merge_table[,collist], 1, function(row) "NA" %in% row)
114 and then type,
115 selected_NA <- merge_table[sel,]
116 # These two commands will help to select NA (character) from your merge_table data.
117
118 Type: write.table(selected_NA, "selected_NA.tsv", sep="\t", row.names=FALSE)
119 # This command will export comparison results (selected_NA) into an actual table file format
120 (selected_NA.tsv).
121
122 Type: sel2 <- apply (selected_NA[,collist], 1, function(row) all(row !=0))
123 and then type,
124 filtering_all_zero <- selected_NA[sel2,]
125 # These two commands will help to discard all "0" from your selected_NA table.
126
127 Type: write.table(filtering_all_zero, "filtering_all_zero.tsv", sep="\t", row.names=FALSE)
128 # This command will export filtered results (filtering_all_zero) into an actual table file format
129 (filtering_all_zero.tsv).
130
131 Type (optional): T4F_filtered_KEGGIDS <- subset(filtering_all_zero, OB12_t4f == "NA" &
132 OB13_t4f == "NA", select = c(X.KEGGID, OB12_t4f, OB13_t4f), header = "true")
133 # This command will show all filtered KEGGIDS results, which includes "NA" only in the
134 OB12_t4f and OB13_t4f. One can change the column name and filter KEGGIDS.
135
136 Type (optional): Filter_KEGGIDS_ONLY <- subset(filtering_all_zero, OB12_t4f == "NA"
137 & OB13_t4f == "NA", select = c(X.KEGGID), header = "true")
138 # This command will filter only KEGGIDS when the selected column includes "NA."
139
140
141
142
143
144
145
146
147
148
149
150

```

151 **Supplementary Material S3:** A list of differences in the taxonomic information identified by  
 152 Silva and Greengene Database. A blank space indicates the taxa that were not identified by the  
 153 respective database.  
 154

|                         | <b>Silva</b>                 | <b>Greengenes</b>            |
|-------------------------|------------------------------|------------------------------|
| <b>Undetected Phyla</b> |                              |                              |
|                         |                              | Armatimonadetes              |
|                         |                              | TM6                          |
|                         |                              | Tenericutes                  |
|                         |                              | Hydrogenedentes              |
|                         |                              | Parcubacteria                |
|                         |                              |                              |
| <b>Undetected Genus</b> |                              |                              |
|                         | A1-B1                        | Acidibacter                  |
|                         | Actinomycetales              | Acidimicrobiaceae            |
|                         | Anaerospora                  | Acidocella                   |
|                         | Bacteriovoracaceae           | Albidiferax                  |
|                         | C111                         | Algoriphagus                 |
|                         | Candidatus Xiphinematobacter | Alistipes                    |
|                         | Chloronema                   | Amphritea                    |
|                         | Clostridiales                | Anaerostipes                 |
|                         | Clostridium                  | Armatimonadetes others       |
|                         | Cryomorphaceae               | Bacteroidales                |
|                         | DH61                         | Bdellovibrio                 |
|                         | Enterobacteriaceae           | Blastocatella                |
|                         | Kaistobacter                 | Blastopirellula              |
|                         | LD19                         | Brevundimonas                |
|                         | Lysobacter                   | Candidatus Chloroploca       |
|                         | Methylibium                  | Candidatus Methylacidiphilum |
|                         | Mycoplana                    | Comamonas                    |
|                         | Oxalobacteraceae             | Cyanobacteria;SubsectionIII  |
|                         | Paucibacter                  | EB1017                       |
|                         | Pirellulaceae                | Ellin6067                    |
|                         | Piscirickettsiaceae          | Ellin6075                    |
|                         | Pseudanabaena                | Cytophaga                    |
|                         | Rikenellaceae                | Duganella                    |
|                         | Rubrivivax                   | Ferruginibacter              |
|                         | S24-7                        | Flavobacteriales             |
|                         | Salinibacterium              | Frigoribacterium             |
|                         | Sinobacteraceae              | Fusicatenibacter             |
|                         | SM1D11                       | Gammaproteobacteria          |
|                         | Solibacteraceae              | Gardnerella                  |

|  |                 |                     |
|--|-----------------|---------------------|
|  | Solibacterales  | Geitlerinema        |
|  | Spirobacillales | Gemmobacter         |
|  | Streptophyta    | Glaciecola          |
|  |                 | Granulicatella      |
|  |                 | Halomicronema       |
|  |                 | Hydrogenedentes     |
|  |                 | Illumatobacter      |
|  |                 | Intestinibacter     |
|  |                 | Ketogulonicigenium  |
|  |                 | Lachnoclostridium   |
|  |                 | Leptothrix          |
|  |                 | Marvinbryantia      |
|  |                 | Massilia            |
|  |                 | Methylobacteriaceae |
|  |                 | Nannocystis         |
|  |                 | Nitrosomonadaceae   |
|  |                 | Noviherbaspirillum  |
|  |                 | Oligoflexaceae      |
|  |                 | Oligoflexales       |
|  |                 | OPB35               |
|  |                 | Parabacteroides     |
|  |                 | Parasutterella      |
|  |                 | Parcubacteria       |
|  |                 | PeM15               |
|  |                 | Peredibacter        |
|  |                 | Pirellula           |
|  |                 | Planctomycetaceae   |
|  |                 | Porphyrobacter      |
|  |                 | Pseudoalteromonas   |
|  |                 | Pseudobutyrvibrio   |
|  |                 | Pseudoxanthomonas   |
|  |                 | Rhodobacter         |
|  |                 | Rhodovarius         |
|  |                 | Roseomonas          |
|  |                 | Sandaracinaceae     |
|  |                 | Sandaracinus        |
|  |                 | Sarcina             |
|  |                 | Silanimonas         |
|  |                 | SJA-149             |
|  |                 | SM1A02              |
|  |                 | Sphingomonas        |

|  |  |                    |
|--|--|--------------------|
|  |  | Sphingopyxis       |
|  |  | Sporichthya        |
|  |  | Stenotrophomonas   |
|  |  | Subdoligranulum    |
|  |  | TA18               |
|  |  | Terrisporobacter   |
|  |  | TM6                |
|  |  | vadinHA49          |
|  |  | Vampirovibrionales |
|  |  | Xanthomonadales    |

155

156

157 **Supplementary Material S4:** A list of KEGG categories was not able to be identified using (a)  
 158 Tax4Fun and (b) PICRUSt bioinformatics tools. Sample list (a) through (h) are presented solely  
 159 for the purpose of organizing the KEGG numbers. OB12\_t4f: OB12 microbial mat sample  
 160 analyzed by using Tax4Fun; OB13\_t4f: OB13 microbial mat sample analyzed by using Tax4Fun;  
 161 OB12\_pie: OB12 microbial mat sample analyzed by using PICRUSt; OB13\_pie: OB13  
 162 microbial mat sample analyzed by using PICRUSt.  
 163

| (a)      |          |          |
|----------|----------|----------|
| X.KEGGID | OB12_t4f | OB13_t4f |
| K00025   | NA       | NA       |
| K00028   | NA       | NA       |
| K00037   | NA       | NA       |
| K00071   | NA       | NA       |
| K00079   | NA       | NA       |
| K00106   | NA       | NA       |
| K00178   | NA       | NA       |
| K00222   | NA       | NA       |
| K00227   | NA       | NA       |
| K00300   | NA       | NA       |
| K00306   | NA       | NA       |
| K00353   | NA       | NA       |
| K00369   | NA       | NA       |
| K00421   | NA       | NA       |
| K00429   | NA       | NA       |
| K00504   | NA       | NA       |
| K00607   | NA       | NA       |
| K00660   | NA       | NA       |
| K00702   | NA       | NA       |
| K00743   | NA       | NA       |
| K00811   | NA       | NA       |
| K00827   | NA       | NA       |
| K00904   | NA       | NA       |
| K00935   | NA       | NA       |
| K00964   | NA       | NA       |
| K01013   | NA       | NA       |
| K01044   | NA       | NA       |
| K01121   | NA       | NA       |
| K01132   | NA       | NA       |
| K01152   | NA       | NA       |
| K01188   | NA       | NA       |
| K01280   | NA       | NA       |
| K01514   | NA       | NA       |

| (b)      |          |          |
|----------|----------|----------|
| X.KEGGID | OB12_pie | OB13_pie |
| K00410   | NA       | NA       |
| K03318   | NA       | NA       |
| K03365   | NA       | NA       |
| K03468   | NA       | NA       |
| K03929   | NA       | NA       |
| K04765   | NA       | NA       |
| K05286   | NA       | NA       |
| K05602   | NA       | NA       |
| K05828   | NA       | NA       |
| K05829   | NA       | NA       |
| K06580   | NA       | NA       |
| K08086   | NA       | NA       |
| K10824   | NA       | NA       |
| K10831   | NA       | NA       |
| K11130   | NA       | NA       |
| K11131   | NA       | NA       |
| K11691   | NA       | NA       |
| K11692   | NA       | NA       |
| K12055   | NA       | NA       |
| K12516   | NA       | NA       |
| K13037   | NA       | NA       |
| K13877   | NA       | NA       |
| K14387   | NA       | NA       |
| K14561   | NA       | NA       |
| K14564   | NA       | NA       |
| K14568   | NA       | NA       |
| K14574   | NA       | NA       |
| K14683   | NA       | NA       |
| K14978   | NA       | NA       |
| K14979   | NA       | NA       |
| K14980   | NA       | NA       |
| K14981   | NA       | NA       |
| K14982   | NA       | NA       |

|        |    |    |
|--------|----|----|
| K01516 | NA | NA |
| K01557 | NA | NA |
| K01634 | NA | NA |
| K01648 | NA | NA |
| K01718 | NA | NA |
| K01762 | NA | NA |
| K01789 | NA | NA |
| K01850 | NA | NA |
| K01930 | NA | NA |
| K01970 | NA | NA |
| K02266 | NA | NA |
| K02312 | NA | NA |
| K02330 | NA | NA |
| K02750 | NA | NA |
| K02753 | NA | NA |
| K02764 | NA | NA |
| K02765 | NA | NA |
| K02779 | NA | NA |
| K02787 | NA | NA |
| K02788 | NA | NA |
| K02790 | NA | NA |
| K02791 | NA | NA |
| K02808 | NA | NA |
| K02809 | NA | NA |
| K02810 | NA | NA |
| K02817 | NA | NA |
| K02818 | NA | NA |
| K02819 | NA | NA |
| K03295 | NA | NA |
| K03743 | NA | NA |
| K03927 | NA | NA |
| K03943 | NA | NA |
| K04340 | NA | NA |
| K04708 | NA | NA |
| K04779 | NA | NA |
| K05344 | NA | NA |
| K05692 | NA | NA |
| K05899 | NA | NA |
| K05929 | NA | NA |
| K05993 | NA | NA |
| K06014 | NA | NA |

|        |    |    |
|--------|----|----|
| K14983 | NA | NA |
| K14986 | NA | NA |
| K14987 | NA | NA |
| K14988 | NA | NA |
| K14989 | NA | NA |
| K15011 | NA | NA |
| K15012 | NA | NA |
| K15045 | NA | NA |
| K15051 | NA | NA |
| K15052 | NA | NA |
| K15054 | NA | NA |
| K15058 | NA | NA |
| K15059 | NA | NA |
| K15064 | NA | NA |
| K15066 | NA | NA |
| K15067 | NA | NA |
| K15125 | NA | NA |
| K15126 | NA | NA |
| K15226 | NA | NA |
| K15228 | NA | NA |
| K15229 | NA | NA |
| K15230 | NA | NA |
| K15231 | NA | NA |
| K15232 | NA | NA |
| K15234 | NA | NA |
| K15242 | NA | NA |
| K15253 | NA | NA |
| K15256 | NA | NA |
| K15257 | NA | NA |
| K15268 | NA | NA |
| K15269 | NA | NA |
| K15270 | NA | NA |
| K15311 | NA | NA |
| K15312 | NA | NA |
| K15313 | NA | NA |
| K15314 | NA | NA |
| K15315 | NA | NA |
| K15320 | NA | NA |
| K15327 | NA | NA |
| K15328 | NA | NA |
| K15329 | NA | NA |

|        |    |    |
|--------|----|----|
| K06021 | NA | NA |
| K06026 | NA | NA |
| K06867 | NA | NA |
| K06873 | NA | NA |
| K06883 | NA | NA |
| K06884 | NA | NA |
| K06885 | NA | NA |
| K06887 | NA | NA |
| K06888 | NA | NA |
| K06889 | NA | NA |
| K06890 | NA | NA |
| K06892 | NA | NA |
| K06893 | NA | NA |
| K06894 | NA | NA |
| K06896 | NA | NA |
| K06897 | NA | NA |
| K06898 | NA | NA |
| K06900 | NA | NA |
| K06903 | NA | NA |
| K06904 | NA | NA |
| K06905 | NA | NA |
| K06906 | NA | NA |
| K06907 | NA | NA |
| K06908 | NA | NA |
| K06910 | NA | NA |
| K06911 | NA | NA |
| K06914 | NA | NA |
| K06915 | NA | NA |
| K06916 | NA | NA |
| K06918 | NA | NA |
| K06921 | NA | NA |
| K06922 | NA | NA |
| K06923 | NA | NA |
| K06926 | NA | NA |
| K06927 | NA | NA |
| K06929 | NA | NA |
| K06934 | NA | NA |
| K06936 | NA | NA |
| K06937 | NA | NA |
| K06938 | NA | NA |
| K06940 | NA | NA |

|        |    |    |
|--------|----|----|
| K15330 | NA | NA |
| K15337 | NA | NA |
| K15342 | NA | NA |
| K15344 | NA | NA |
| K15345 | NA | NA |
| K15346 | NA | NA |
| K15347 | NA | NA |
| K15349 | NA | NA |
| K15350 | NA | NA |
| K15351 | NA | NA |
| K15352 | NA | NA |
| K15353 | NA | NA |
| K15354 | NA | NA |
| K15355 | NA | NA |
| K15357 | NA | NA |
| K15358 | NA | NA |
| K15366 | NA | NA |
| K15367 | NA | NA |
| K15368 | NA | NA |
| K15371 | NA | NA |
| K15372 | NA | NA |
| K15373 | NA | NA |
| K15383 | NA | NA |
| K15395 | NA | NA |
| K15396 | NA | NA |
| K15408 | NA | NA |
| K15429 | NA | NA |
| K15431 | NA | NA |
| K15460 | NA | NA |
| K15461 | NA | NA |
| K15466 | NA | NA |
| K15467 | NA | NA |
| K15468 | NA | NA |
| K15469 | NA | NA |
| K15470 | NA | NA |
| K15471 | NA | NA |
| K15473 | NA | NA |
| K15474 | NA | NA |
| K15475 | NA | NA |
| K15476 | NA | NA |
| K15477 | NA | NA |

|        |    |    |
|--------|----|----|
| K06942 | NA | NA |
| K06944 | NA | NA |
| K06945 | NA | NA |
| K06946 | NA | NA |
| K06948 | NA | NA |
| K06951 | NA | NA |
| K06952 | NA | NA |
| K06953 | NA | NA |
| K06954 | NA | NA |
| K06955 | NA | NA |
| K06956 | NA | NA |
| K06960 | NA | NA |
| K06962 | NA | NA |
| K06966 | NA | NA |
| K06971 | NA | NA |
| K06972 | NA | NA |
| K06973 | NA | NA |
| K06974 | NA | NA |
| K06975 | NA | NA |
| K06976 | NA | NA |
| K06977 | NA | NA |
| K06978 | NA | NA |
| K06979 | NA | NA |
| K06980 | NA | NA |
| K06981 | NA | NA |
| K06983 | NA | NA |
| K06986 | NA | NA |
| K06987 | NA | NA |
| K06988 | NA | NA |
| K06990 | NA | NA |
| K06991 | NA | NA |
| K06992 | NA | NA |
| K06995 | NA | NA |
| K06996 | NA | NA |
| K06997 | NA | NA |
| K06998 | NA | NA |
| K07000 | NA | NA |
| K07002 | NA | NA |
| K07003 | NA | NA |
| K07004 | NA | NA |
| K07005 | NA | NA |

|        |    |    |
|--------|----|----|
| K15478 | NA | NA |
| K15479 | NA | NA |
| K15480 | NA | NA |
| K15481 | NA | NA |
| K15482 | NA | NA |
| K15483 | NA | NA |
| K15484 | NA | NA |
| K15486 | NA | NA |
| K15487 | NA | NA |
| K15488 | NA | NA |
| K15490 | NA | NA |
| K15491 | NA | NA |
| K15492 | NA | NA |
| K15495 | NA | NA |
| K15496 | NA | NA |
| K15497 | NA | NA |
| K15509 | NA | NA |
| K15510 | NA | NA |
| K15511 | NA | NA |
| K15512 | NA | NA |
| K15513 | NA | NA |
| K15514 | NA | NA |
| K15515 | NA | NA |
| K15518 | NA | NA |
| K15519 | NA | NA |
| K15520 | NA | NA |
| K15521 | NA | NA |
| K15524 | NA | NA |
| K15525 | NA | NA |
| K15526 | NA | NA |
| K15527 | NA | NA |
| K15531 | NA | NA |
| K15532 | NA | NA |
| K15533 | NA | NA |
| K15534 | NA | NA |
| K15536 | NA | NA |
| K15539 | NA | NA |
| K15540 | NA | NA |
| K15545 | NA | NA |
| K15546 | NA | NA |
| K15547 | NA | NA |

|        |    |    |
|--------|----|----|
| K07006 | NA | NA |
| K07007 | NA | NA |
| K07009 | NA | NA |
| K07011 | NA | NA |
| K07012 | NA | NA |
| K07013 | NA | NA |
| K07014 | NA | NA |
| K07015 | NA | NA |
| K07016 | NA | NA |
| K07017 | NA | NA |
| K07018 | NA | NA |
| K07019 | NA | NA |
| K07020 | NA | NA |
| K07021 | NA | NA |
| K07024 | NA | NA |
| K07027 | NA | NA |
| K07028 | NA | NA |
| K07029 | NA | NA |
| K07030 | NA | NA |
| K07032 | NA | NA |
| K07033 | NA | NA |
| K07034 | NA | NA |
| K07035 | NA | NA |
| K07037 | NA | NA |
| K07043 | NA | NA |
| K07044 | NA | NA |
| K07045 | NA | NA |
| K07046 | NA | NA |
| K07047 | NA | NA |
| K07050 | NA | NA |
| K07051 | NA | NA |
| K07052 | NA | NA |
| K07053 | NA | NA |
| K07054 | NA | NA |
| K07057 | NA | NA |
| K07059 | NA | NA |
| K07062 | NA | NA |
| K07063 | NA | NA |
| K07064 | NA | NA |
| K07065 | NA | NA |
| K07066 | NA | NA |

|        |    |    |
|--------|----|----|
| K15548 | NA | NA |
| K15549 | NA | NA |
| K15550 | NA | NA |
| K15551 | NA | NA |
| K15552 | NA | NA |
| K15553 | NA | NA |
| K15554 | NA | NA |
| K15555 | NA | NA |
| K15576 | NA | NA |
| K15577 | NA | NA |
| K15578 | NA | NA |
| K15579 | NA | NA |
| K15580 | NA | NA |
| K15581 | NA | NA |
| K15582 | NA | NA |
| K15583 | NA | NA |
| K15584 | NA | NA |
| K15585 | NA | NA |
| K15586 | NA | NA |
| K15587 | NA | NA |
| K15598 | NA | NA |
| K15599 | NA | NA |
| K15600 | NA | NA |
| K15629 | NA | NA |
| K15632 | NA | NA |
| K15633 | NA | NA |
| K15634 | NA | NA |
| K15635 | NA | NA |
| K15640 | NA | NA |
| K15641 | NA | NA |
| K15642 | NA | NA |
| K15643 | NA | NA |
| K15644 | NA | NA |
| K15645 | NA | NA |
| K15646 | NA | NA |
| K15647 | NA | NA |
| K15649 | NA | NA |
| K15650 | NA | NA |
| K15651 | NA | NA |
| K15652 | NA | NA |
| K15653 | NA | NA |

|        |    |    |
|--------|----|----|
| K07068 | NA | NA |
| K07069 | NA | NA |
| K07070 | NA | NA |
| K07071 | NA | NA |
| K07072 | NA | NA |
| K07074 | NA | NA |
| K07075 | NA | NA |
| K07076 | NA | NA |
| K07077 | NA | NA |
| K07078 | NA | NA |
| K07079 | NA | NA |
| K07080 | NA | NA |
| K07081 | NA | NA |
| K07083 | NA | NA |
| K07084 | NA | NA |
| K07086 | NA | NA |
| K07088 | NA | NA |
| K07089 | NA | NA |
| K07090 | NA | NA |
| K07092 | NA | NA |
| K07093 | NA | NA |
| K07095 | NA | NA |
| K07096 | NA | NA |
| K07097 | NA | NA |
| K07098 | NA | NA |
| K07099 | NA | NA |
| K07100 | NA | NA |
| K07101 | NA | NA |
| K07102 | NA | NA |
| K07104 | NA | NA |
| K07105 | NA | NA |
| K07109 | NA | NA |
| K07110 | NA | NA |
| K07112 | NA | NA |
| K07115 | NA | NA |
| K07117 | NA | NA |
| K07118 | NA | NA |
| K07119 | NA | NA |
| K07120 | NA | NA |
| K07121 | NA | NA |
| K07122 | NA | NA |

|        |    |    |
|--------|----|----|
| K15654 | NA | NA |
| K15655 | NA | NA |
| K15656 | NA | NA |
| K15657 | NA | NA |
| K15658 | NA | NA |
| K15659 | NA | NA |
| K15660 | NA | NA |
| K15661 | NA | NA |
| K15662 | NA | NA |
| K15663 | NA | NA |
| K15664 | NA | NA |
| K15665 | NA | NA |
| K15666 | NA | NA |
| K15667 | NA | NA |
| K15668 | NA | NA |
| K15669 | NA | NA |
| K15670 | NA | NA |
| K15671 | NA | NA |
| K15672 | NA | NA |
| K15673 | NA | NA |
| K15674 | NA | NA |
| K15675 | NA | NA |
| K15676 | NA | NA |
| K15677 | NA | NA |
| K15678 | NA | NA |
| K15679 | NA | NA |
| K15681 | NA | NA |
| K15721 | NA | NA |
| K15722 | NA | NA |
| K15723 | NA | NA |
| K15724 | NA | NA |
| K15725 | NA | NA |
| K15726 | NA | NA |
| K15727 | NA | NA |
| K15733 | NA | NA |
| K15735 | NA | NA |
| K15736 | NA | NA |
| K15737 | NA | NA |
| K15738 | NA | NA |
| K15739 | NA | NA |
| K15740 | NA | NA |

|        |    |    |
|--------|----|----|
| K07123 | NA | NA |
| K07124 | NA | NA |
| K07126 | NA | NA |
| K07128 | NA | NA |
| K07131 | NA | NA |
| K07132 | NA | NA |
| K07133 | NA | NA |
| K07136 | NA | NA |
| K07137 | NA | NA |
| K07138 | NA | NA |
| K07139 | NA | NA |
| K07140 | NA | NA |
| K07145 | NA | NA |
| K07147 | NA | NA |
| K07149 | NA | NA |
| K07150 | NA | NA |
| K07152 | NA | NA |
| K07156 | NA | NA |
| K07157 | NA | NA |
| K07161 | NA | NA |
| K07164 | NA | NA |
| K07230 | NA | NA |
| K07281 | NA | NA |
| K07291 | NA | NA |
| K07512 | NA | NA |
| K07748 | NA | NA |
| K07755 | NA | NA |
| K08071 | NA | NA |
| K08286 | NA | NA |
| K08684 | NA | NA |
| K08686 | NA | NA |
| K08693 | NA | NA |
| K08762 | NA | NA |
| K08946 | NA | NA |
| K09151 | NA | NA |
| K09611 | NA | NA |
| K09650 | NA | NA |
| K09715 | NA | NA |
| K10672 | NA | NA |
| K10826 | NA | NA |
| K10828 | NA | NA |

|        |    |    |
|--------|----|----|
| K15746 | NA | NA |
| K15750 | NA | NA |
| K15758 | NA | NA |
| K15760 | NA | NA |
| K15761 | NA | NA |
| K15762 | NA | NA |
| K15763 | NA | NA |
| K15764 | NA | NA |
| K15765 | NA | NA |
| K15770 | NA | NA |
| K15771 | NA | NA |
| K15772 | NA | NA |
| K15773 | NA | NA |
| K15778 | NA | NA |
| K15780 | NA | NA |
| K15781 | NA | NA |
| K15782 | NA | NA |
| K15783 | NA | NA |
| K15784 | NA | NA |
| K15785 | NA | NA |
| K15786 | NA | NA |
| K15790 | NA | NA |
| K15792 | NA | NA |
| K15827 | NA | NA |
| K15828 | NA | NA |
| K15829 | NA | NA |
| K15830 | NA | NA |
| K15831 | NA | NA |
| K15832 | NA | NA |
| K15833 | NA | NA |
| K15834 | NA | NA |
| K15835 | NA | NA |
| K15836 | NA | NA |
| K15842 | NA | NA |
| K15843 | NA | NA |
| K15844 | NA | NA |
| K15845 | NA | NA |
| K15846 | NA | NA |
| K15850 | NA | NA |
| K15852 | NA | NA |
| K15853 | NA | NA |

|        |    |    |
|--------|----|----|
| K10848 | NA | NA |
| K11173 | NA | NA |
| K11183 | NA | NA |
| K11192 | NA | NA |
| K11214 | NA | NA |
| K11418 | NA | NA |
| K11517 | NA | NA |
| K12449 | NA | NA |
| K12451 | NA | NA |
| K12659 | NA | NA |
| K13011 | NA | NA |
| K13237 | NA | NA |
| K13238 | NA | NA |
| K13317 | NA | NA |
| K13410 | NA | NA |
| K13524 | NA | NA |
| K13811 | NA | NA |
| K14750 | NA | NA |

|        |    |    |
|--------|----|----|
| K15854 | NA | NA |
| K15855 | NA | NA |
| K15861 | NA | NA |
| K15862 | NA | NA |
| K15864 | NA | NA |
| K15866 | NA | NA |
| K15868 | NA | NA |
| K15876 | NA | NA |
| K15878 | NA | NA |
| K15888 | NA | NA |
| K15894 | NA | NA |
| K15895 | NA | NA |
| K15896 | NA | NA |
| K15897 | NA | NA |
| K15898 | NA | NA |
| K15899 | NA | NA |
| K15900 | NA | NA |
| K15904 | NA | NA |
| K15905 | NA | NA |
| K15906 | NA | NA |
| K15907 | NA | NA |
| K15910 | NA | NA |
| K15911 | NA | NA |
| K15912 | NA | NA |
| K15913 | NA | NA |
| K15914 | NA | NA |
| K15915 | NA | NA |
| K15916 | NA | NA |
| K15918 | NA | NA |
| K15921 | NA | NA |
| K15922 | NA | NA |
| K15923 | NA | NA |
| K15924 | NA | NA |
| K15973 | NA | NA |
| K15974 | NA | NA |
| K15975 | NA | NA |
| K15976 | NA | NA |
| K15977 | NA | NA |
| K15981 | NA | NA |
| K15982 | NA | NA |
| K15983 | NA | NA |

|        |    |    |
|--------|----|----|
| K15984 | NA | NA |
| K15986 | NA | NA |
| K15987 | NA | NA |
| K16011 | NA | NA |
| K16012 | NA | NA |
| K16013 | NA | NA |
| K16014 | NA | NA |
| K16015 | NA | NA |
| K16016 | NA | NA |
| K16017 | NA | NA |
| K16018 | NA | NA |
| K16019 | NA | NA |
| K16020 | NA | NA |
| K16021 | NA | NA |
| K16022 | NA | NA |
| K16023 | NA | NA |
| K16041 | NA | NA |
| K16042 | NA | NA |
| K16043 | NA | NA |
| K16044 | NA | NA |
| K16045 | NA | NA |
| K16046 | NA | NA |
| K16047 | NA | NA |
| K16048 | NA | NA |
| K16049 | NA | NA |
| K16050 | NA | NA |
| K16051 | NA | NA |
| K16052 | NA | NA |
| K16053 | NA | NA |
| K16055 | NA | NA |
| K16066 | NA | NA |
| K16074 | NA | NA |
| K16076 | NA | NA |
| K16077 | NA | NA |
| K16078 | NA | NA |
| K16079 | NA | NA |
| K16080 | NA | NA |
| K16081 | NA | NA |
| K16087 | NA | NA |
| K16088 | NA | NA |
| K16089 | NA | NA |

|        |    |    |
|--------|----|----|
| K16090 | NA | NA |
| K16091 | NA | NA |
| K16092 | NA | NA |
| K16119 | NA | NA |
| K16120 | NA | NA |
| K16123 | NA | NA |
| K16124 | NA | NA |
| K16128 | NA | NA |
| K16130 | NA | NA |
| K16135 | NA | NA |
| K16136 | NA | NA |
| K16137 | NA | NA |
| K16138 | NA | NA |
| K16139 | NA | NA |
| K16140 | NA | NA |
| K16146 | NA | NA |
| K16147 | NA | NA |
| K16148 | NA | NA |
| K16149 | NA | NA |
| K16150 | NA | NA |
| K16152 | NA | NA |
| K16153 | NA | NA |
| K16154 | NA | NA |
| K16155 | NA | NA |
| K16156 | NA | NA |
| K16157 | NA | NA |
| K16158 | NA | NA |
| K16159 | NA | NA |
| K16160 | NA | NA |
| K16161 | NA | NA |
| K16162 | NA | NA |
| K16163 | NA | NA |
| K16164 | NA | NA |
| K16165 | NA | NA |
| K16167 | NA | NA |
| K16168 | NA | NA |
| K16169 | NA | NA |
| K16170 | NA | NA |
| K16171 | NA | NA |
| K16173 | NA | NA |
| K16176 | NA | NA |

|        |    |    |
|--------|----|----|
| K16177 | NA | NA |
| K16178 | NA | NA |
| K16179 | NA | NA |
| K16180 | NA | NA |
| K16181 | NA | NA |
| K16182 | NA | NA |
| K16183 | NA | NA |
| K16187 | NA | NA |
| K16188 | NA | NA |
| K16190 | NA | NA |
| K16191 | NA | NA |
| K16192 | NA | NA |
| K16193 | NA | NA |
| K16199 | NA | NA |
| K16200 | NA | NA |
| K16201 | NA | NA |
| K16202 | NA | NA |
| K16203 | NA | NA |
| K16209 | NA | NA |
| K16210 | NA | NA |
| K16211 | NA | NA |
| K16212 | NA | NA |
| K16213 | NA | NA |
| K16214 | NA | NA |
| K16215 | NA | NA |
| K16216 | NA | NA |
| K16217 | NA | NA |
| K16218 | NA | NA |
| K16227 | NA | NA |
| K16228 | NA | NA |
| K16229 | NA | NA |
| K16232 | NA | NA |
| K16233 | NA | NA |
| K16239 | NA | NA |
| K16242 | NA | NA |
| K16243 | NA | NA |
| K16244 | NA | NA |
| K16245 | NA | NA |
| K16246 | NA | NA |
| K16247 | NA | NA |
| K16248 | NA | NA |

|        |    |    |
|--------|----|----|
| K16249 | NA | NA |
| K16254 | NA | NA |
| K16255 | NA | NA |
| K16256 | NA | NA |
| K16257 | NA | NA |
| K16258 | NA | NA |
| K16259 | NA | NA |
| K16260 | NA | NA |
| K16263 | NA | NA |
| K16264 | NA | NA |
| K16267 | NA | NA |
| K16291 | NA | NA |
| K16293 | NA | NA |
| K16294 | NA | NA |
| K16299 | NA | NA |
| K16300 | NA | NA |
| K16301 | NA | NA |
| K16303 | NA | NA |
| K16305 | NA | NA |
| K16306 | NA | NA |
| K16317 | NA | NA |
| K16318 | NA | NA |
| K16319 | NA | NA |
| K16320 | NA | NA |
| K16321 | NA | NA |
| K16322 | NA | NA |
| K16323 | NA | NA |
| K16324 | NA | NA |
| K16325 | NA | NA |
| K16326 | NA | NA |
| K16327 | NA | NA |
| K16328 | NA | NA |
| K16329 | NA | NA |
